# Supplementary material for: Hydrosilane reduction and 1,5-hydride transfer in the [2-(3-ethoxythienyl)]di(1-adamantyl)methyl cation †
Source: Royal Society of Chemistry journal article supplement (doi:10.1039/a909571c), 2000-01-01
Supplement: a909571c.doc [file a909571c.doc]

# Supplementary data

**Hydrosilane reduction and 1,5-hydride transfer in the [2-(3-ethoxythienyl)]di(1-adamantyl)methyl cation**

**John S. Lomas*** **and Edouard Vauthier**

*Institut de Topologie et de Dynamique des Systèmes, Université de Paris 7, associé au C. N. R. S., 1 rue Guy de la Brosse, 75005 Paris, France*

**General Methods**

NMR measurements were performed on a Bruker AS 200 FT instrument operating at 200 MHz (proton) or 50 MHz (carbon). Chemical shifts are given in ppm and *J* values in Hz. Measurements were made in hexadeuteriobenzene, deuteriochloroform, pentadeuteriopyridine, hexadeuteriodimethylsulfoxide or dichlorodi-deuteriomethane (reference values: **H = 7.16, 7.26, 8.71, 2.50 and 5.32 ppm for 1H; **C = 128.0, 77.0, 149.9, 39.5 and 53.8 ppm). Carbon and hydrogen shifts of the aromatic system are numbered: C2, C3, etc. The proton signals were assigned on the basis of shifts and coupling constants. The corresponding 13C signals were identified by heteronuclear correlation experiments. IR spectra were measured in carbon tetrachloride on a Nicolet Magna 860 FTIR spectrometer with 1 cm-1 resolution. Column chromatography was performed on silica gel 60 (Merck) in light petroleum (boiling range 35-60 °C)-dichloromethane mixtures or on alumina (Merck, Brockmann III) in light petroleum-diethyl ether mixtures. Melting points were determined in capillary glass tubes on a Mettler FP5 instrument with a heating rate of 3 °C min-1.

**Alcohol synthesis. 2A**

To a solution of 3-ethoxythiophene (5 mmol) and TMEDA (0.75 cm3, 5 mmol) in sodium-dry diethyl ether (15 cm3) stirred at room temperature under argon was added a solution of *n*-butyllithium in hexane (1.6 M, 3 cm3, 4.8 mmol). After 30 min di(1-adamantyl) ketone (0.30 g, 1.0 mmol, no solvent) was added. After 0.5-1 h the reaction mixture was quenched with water and the organic material extracted with hexane, washed with water and dried. Evaporation of the solvents gave a dark brown residue which was purified by column chromatography on alumina to give the required alcohol: yield 79%; mp 150 °C; **OH/cm-1 (CCl4) 3495; **C (chloroform) 15.3 (CH3), 29.3 (6 CH), 37.2 (6 CH2), 38.7 (6 CH2), 46.0 (2 Cq), 68.8 (CH2), 87.3 (OH), 116.5 (C4), 120.8 (C5), 124.0 (C2) and 154.2 (C3); **H (chloroform) 1.39 (CH3, *J* 7.0), 1.6-2.2 (br m, Ad), 4.08 (CH2, *J* 7.0), 6.02 (OH), 6.79 (H4, *J* 5.6) and 7.07 (H5, *J* 5.6); **H(OH) 6.25, 5.96 and 6.29 ppm in C6D6, DMSO-*d*6 and C5D5N, respectively; **/*T* = -1.910.03 ppb/°C in the last solvent. (Found: C, 76.1; H, 8.9. C27H38O2S requires C, 76.01; H, 8.98%).

**Trifluoroacetylation**

Alcohol **2A** (*ca*. 10 mg, 0.023 mmol) was treated with TFA (0.02 cm3) in deuteriated dichloromethane (0.5 cm3) at 25 °C. The 1H NMR spectrum showed over 30 min changes in the aromatic region, with the appearance of 5.5 Hz doublets, indicating the formation of a new material which then disappeared in favour of a second compound; this latter was completely degraded overnight. Associated changes in the aliphatic part of the spectrum indicated that the first compound was a trifluoroacetate, **3**, and the second a hydroxy derivative, **4**, accompanied by acetaldehyde. **2A**: **H (dichloromethane-TFA) 1.38 (CH3, *J* 7.0), 1.5-2.1 (br m, Ad), 4.16 (CH2, *J* 7.0), 6.79 (H4, *J* 5.5) and 7.18 (H5, *J* 5.5); **3**: **H (dichloromethane-TFA) 1.5-2.1 (br m, Ad), 1.75 (CH3, *J* 5.1), 2.74 (Ad2C*H*), 6.51 (CH, *J* 5.1), 6.85 (H4, *J* 5.5) and 7.10 (H5, *J* 0.8 and 5.5); **4**: **H (dichloromethane-TFA) 1.5-2.1 (br m, Ad), 2.42 (Ad2C*H*), 6.71 (H4, *J* 5.5) and 7.04 (H5, *J* 0.8 and 5.5); acetaldehyde: **H (dichloromethane-TFA) 2.34 (CH3, *J* 3.1) and 9.75 (CH). Integration of the various signals gave the relative concentrations of **2A**, **3** and **4**, from which rough first-order rate constants were evaluated from the rate of disappearance of **2A**, the position of the maximum in the concentration of **7** and by simulation.9 Due to degradation of **4** the total integrated intensity of the identifiable products fell by about 15% during the course of a run. This was simulated by postulating a first-order rate constant for this reaction.

# Ionic hydrogenation

Treatment of alcohol **2A** (150 mg, 0.35 mmol) in dichloromethane (15 cm3) with TES (0.2 cm3, 1.25 mmol) and TFA (0.75 cm3) at room temperature for 1 h gave [2-(3-ethoxythienyl)]di(1-adamantyl)methanes, **5A**, **5S** and **4**, in a ratio of about 3:1:2. Column chromatography on silica gel gave a mixture of **5A** and **5S** (91 mg, 63%) and impure **4** (63 mg). **5A**: **C (chloroform) 15.6 (CH3), 29.2 (6 CH), 37.0 (6 CH2), 39.2 (2 Cq), 42.4 (6 CH2), 57.3 (CH), 66.9 (CH2) (triplet at 66.6 ppm, *J* 21.1, in **8**), 115.9 (C4), 119.7 (C5), 122.5 (C2) and 154.5 (C3); **H (chloroform) 1.36 (CH3, *J* 7.0), 1.5-2.1 (br m, Ad), 2.79 (Ad2C*H*), 4.01 (CH2, *J* 7.0), 6.83 (H4, *J* 5.5) and 7.02 (H5, *J* 5.5). **5S**: **C (chloroform) 15.3 (CH3), 29.4 (6 CH), 37.1 (6 CH2), 39.8 (2 Cq), 43.1 (6 CH2), 63.3 (CH) (triplet at 62.7 ppm, *J* 18, in deuteriated material), 65.9 (CH2), 116.9 (C4), 119.3 (C5), 120.9 (C2) and 151.6 (C3); **H (chloroform) 1.40 (CH3, *J* 7.0), 1.5-2.1 (br m, Ad), 1.99 (Ad2C*H*), 4.04 (CH2, *J* 7.0), 6.82 (H4, *J* 5.5) and 6.93 (H5, *J* 5.5); **4**: **H (chloroform) 1.5-2.1 (br m, Ad), 2.41 (Ad2C*H*), 4.33 (OH), 6.67 (H4, *J* 5.4) and 6.98 (H5, *J* 5.5); **C (chloroform) 29.1 (6 CH), 36.9 (6 CH2), 39.2 (2 Cq), 42.5 (6 CH2), 58.9 (CH), 118.1 (C4), 119.3 (C2), 120.1 (C5) and 151.3 (C3). Recrystallization of the **5A**-**5S** mixture (from several experiments) from *n*-hexane gave pure **5A**: mp 189 °C (Found: C, 79.0; H, 9.3. C27H38OS requires C, 78.97; H, 9.33%). Recrystallization of crude **4** from *n*-hexane gave pure material: mp 206 °C; **OH/cm-1 (CCl4) 3600, 3616 (Found: C, 78.2; H, 8.8. C25H34OS requires C, 78.49; H, 8.96%).

On a smaller scale, to a stirred solution of alcohol **2A** (42 mg, 0.1 mmol) and a hydrosilane (0.4-1.6 mmol) in dichloromethane (5 cm3) at room temperature (202 °C) was added TFA (0.2 cm3). After 1.5 h water and pentane were added, the organic phase washed with water, then dried and the solvents evaporated under reduced pressure. The relative yields (1-2%) were estimated by integration of the aromatic and Ad2C*H* signals of the 1H NMR spectrum

**DFT calculations**

Heats of formation of carbocations and carboxonium ions in the gas phase at 25 °C were calculated by the X(3-21G)//STO-3G approach.7 The parameter  is treated as a variable and adapted "*a priori*" to each molecule, depending on the number and type of atoms involved. This model is comparable in accuracy to B3LYP/6-311(d,p)//B3LYP/6-311(d,p), but is more economical on computer time and, most importantly, is parametrized for second-row elements. For simplicity, 1-adamantyl groups were replaced by *tert*-butyls which have similar steric requirements but are less rigid. Optimized values [parent alcohol, carbocation (Hf°/kcal mol‑1), interplanar angle (/°), carboxonium ion (Hf°/kcal mol‑1)] are as follows: **1S-Me**, 77.6, 81, 74.0; **1S-Et**, 66.2, 80, 51.9; **2A-Me**, 77.7, 31, 79.2; **2A-Et**, 62.6, 30, 58.0.

**Kinetic modelling**

The use of the KINAL kinetic simulation programme9 with a Simplex routine has been described in a previous publication.5 Rate constants *k*2, *k*3 and *k*4 in the Scheme were optimized for arbitrarily defined values of *k*0, *k*1 and *k*5. Values of *k*0 and *k*1 only determine the time-scale of the reaction and must be compatible with the "infinity" time value for complete reaction; *k*5 must be compatible with *k*1 since, if it is too small, the programme converges badly and gives spurious results (Table 2).

**Table 1**  Relative yields (1-2%) for reduction of 2-(3-ethoxy-thienyl)di(1-adamantyl)methanol, **2A,** by TFA-hydrosilane in dichloromethane; [**2A**]o = 0.018-0.019; [TFA]o = 0.48-0.50.

| Hydrosilane | [R3SiL]o | %**5A** | %**5S** | %**4** | %**8** |
| --- | --- | --- | --- | --- | --- |
| TES-h | 0.0726 | 52.5 | 10.8 | 36.8 |  |
| TES-h | 0.1500 | 62.7 | 19.1 | 18.3 |  |
| TES-h | 0.2245 | 61.0 | 27.8 | 11.3 |  |
| TES-h | 0.2893 | 59.7 | 31.6 | 8.8 |  |
| DMPS-h | 0.0760 | 45.2 | 36.2 | 18.6 |  |
| DMPS-h | 0.1124 | 46.3 | 41.7 | 12.0 |  |
| DMPS-h | 0.1502 | 45.5 | 45.4 | 9.2 |  |
| DMPS-h | 0.1906 | 42.9 | 51.2 | 5.9 |  |
| DMPS-h | 0.2228 | 43.5 | 52.3 | 4.2 |  |
| DMPS-h | 0.2613 | 42.5 | 54.6 | 2.9 |  |
| DMPS-d | 0.0750 | 11.8 | 23.9 | 33.2 | 31.1 |
| DMPS-d | 0.1115 | 14.6 | 32.9 | 21.0 | 31.6 |
| DMPS-d | 0.1526 | 17.3 | 37.5 | 14.3 | 30.7 |
| DMPS-d | 0.1875 | 18.4 | 43.3 | 11.4 | 26.9 |
| DMPS-d | 0.2207 | 20.2 | 44.2 | 8.6 | 27.1 |
| DMPS-d | 0.2600 | 21.8 | 47.4 | 6.2 | 24.6 |
| DMPS-d | 0.2958 | 21.5 | 49.0 | 6.0 | 23.5 |
| TIPS-h | 0.0753 | 29.8 | 0.0 | 70.2 |  |
| TTMSS-h | 0.0760 | 23.1 | 4.5 | 72.4 |  |

**Table 2** Kinetic simulation of product composition for the reaction of 2-(3-ethoxythienyl)di(1-adamantyl)methanol, **2A,** with TFA and dimethylphenylsilane in dichloromethane; [**2A**]o = 0.018-0.019; arbitrary constants: *k*0 = *k*1 = 1 x 10-3 s-1; *k*5 = 1 x 10-4 s‑1.

| [R3SiL]o | 103 x *k*2/s-1 | 103 *k*3/s-1 | 103 *k*4/s-1 |
| --- | --- | --- | --- |
| L = D |  |  |  |
| 0.0750 | 2.587 | 5.241 | 1.423 |
| 0.1115 | 2.611 | 5.890 | 1.498 |
| 0.1526 | 2.611 | 5.661 | 1.504 |
| 0.1875 | 2.655 | 6.248 | 1.348 |
| 0.2207 | 2.646 | 5.795 | 1.518 |
| 0.2600 | 2.800 | 6.089 | 1.605 |
| 0.2958 | 2.526 | 5.758 | 1.384 |
| Means | 2.630.08 | 5.810.32 | 1.470.09 |
| L=H |  |  |  |
| 0.0760 | 4.391 | 10.88 | 2.408 |
| 0.1124 | 4.533 | 10.00 | 2.287 |
| 0.1502 | 4.187 | 9.28 | 1.984 |
| 0.1906 | 4.952 | 10.93 | 1.886 |
| 0.2228 | 4.594 | 10.14 | 2.250 |
| 0.2613 | 4.714 | 10.42 | 2.476 |
| Means | 4.650.28 | 10.30.6 | 2.220.23 |
